# Supplementary material
Source: PubMed Central journal article supplement (PMC3945433)
Supplement: NIHMS549284-supplement-125_2013_3111_MOESM1_ESM.pdf [file NIHMS549284-supplement-125_2013_3111_MOESM1_ESM.pdf]

| Gene Symbol    | Description                                                                                               | Average 2 <sup>-ΔCt</sup> |          | p -value |
|----------------|-----------------------------------------------------------------------------------------------------------|---------------------------|----------|----------|
|                |                                                                                                           | Saline                    | Lipid    |          |
| <i>BTK</i>     | Bruton agammaglobulinemia tyrosine kinase                                                                 | 9.85E-06                  | 1.36E-05 | 0.220    |
| <i>CASP8</i>   | Caspase 8, apoptosis-related cysteine peptidase                                                           | 2.30E-04                  | 3.24E-04 | 0.070    |
| <i>CCL2</i>    | Chemokine (C-C motif) ligand 2                                                                            | 7.93E-05                  | 7.01E-05 | 0.311    |
| <i>CD14</i>    | CD14 molecule                                                                                             | 3.93E-04                  | 4.98E-04 | 0.234    |
| <i>CD180</i>   | CD180 molecule                                                                                            | 2.69E-05                  | 3.85E-05 | 0.313    |
| <i>CD80</i>    | CD80 molecule                                                                                             | 1.42E-05                  | 1.44E-05 | 0.681    |
| <i>CD86</i>    | CD86 molecule                                                                                             | 5.36E-05                  | 6.30E-05 | 0.229    |
| <i>CHUK</i>    | Conserved helix-loop-helix ubiquitous kinase                                                              | 1.08E-03                  | 1.36E-03 | 0.017    |
| <i>CLEC4E</i>  | C-type lectin domain family 4, member E                                                                   | 1.24E-05                  | 2.39E-05 | 0.134    |
| <i>CSF2</i>    | Colony stimulating factor 2 (granulocyte-macrophage)                                                      | 5.97E-06                  | 5.34E-06 | 0.460    |
| <i>CSF3</i>    | Colony stimulating factor 3 (granulocyte)                                                                 | 8.35E-04                  | 1.28E-03 | 0.067    |
| <i>CXCL10</i>  | Chemokine (C-X-C motif) ligand 10                                                                         | 9.02E-05                  | 9.37E-05 | 0.409    |
| <i>ECSIT</i>   | ECSIT homolog (Drosophila)                                                                                | 5.79E-03                  | 7.16E-03 | 0.034    |
| <i>EIF2AK2</i> | Eukaryotic translation initiation factor 2-alpha kinase 2                                                 | 1.94E-03                  | 2.34E-03 | 0.045    |
| <i>ELK1</i>    | ELK1, member of ETS oncogene family                                                                       | 4.02E-04                  | 4.02E-04 | 0.723    |
| <i>FADD</i>    | Fas (TNFRSF6)-associated via death domain                                                                 | 5.23E-04                  | 7.02E-04 | 0.041    |
| <i>FOS</i>     | FBJ murine osteosarcoma viral oncogene homolog                                                            | 6.32E-04                  | 1.41E-03 | 0.102    |
| <i>HMGB1</i>   | High mobility group box 1                                                                                 | 9.59E-03                  | 1.16E-02 | 0.050    |
| <i>HRAS</i>    | V-Ha-ras Harvey rat sarcoma viral oncogene homolog                                                        | 4.90E-03                  | 5.81E-03 | 0.065    |
| <i>HSPA1A</i>  | Heat shock 70kDa protein 1A                                                                               | 2.06E-02                  | 2.51E-02 | 0.051    |
| <i>HSPD1</i>   | Heat shock 60kDa protein 1 (chaperonin)                                                                   | 1.06E-02                  | 1.43E-02 | 0.235    |
| <i>IFNA1</i>   | Interferon, alpha 1                                                                                       | 4.27E-06                  | 5.08E-06 | 0.146    |
| <i>IFNB1</i>   | Interferon, beta 1, fibroblast                                                                            | 4.27E-06                  | 7.37E-06 | 0.123    |
| <i>IFNG</i>    | Interferon, gamma                                                                                         | 2.01E-05                  | 2.94E-05 | 0.434    |
| <i>IKBKB</i>   | Inhibitor of kappa light polypeptide gene enhancer in B-cells, kinase beta                                | 2.04E-03                  | 2.36E-03 | 0.152    |
| <i>IL10</i>    | Interleukin 10                                                                                            | 5.99E-06                  | 6.00E-06 | 0.515    |
| <i>IL12A</i>   | Interleukin 12A (natural killer cell stimulatory factor 1, cytotoxic lymphocyte maturation factor 1, p35) | 1.80E-05                  | 2.33E-05 | 0.143    |
| <i>IL1A</i>    | Interleukin 1, alpha                                                                                      | 7.93E-06                  | 5.08E-06 | 0.116    |
| <i>IL1B</i>    | Interleukin 1, beta                                                                                       | 8.74E-06                  | 2.41E-05 | 0.247    |
| <i>IL2</i>     | Interleukin 2                                                                                             | 4.62E-06                  | 7.01E-06 | 0.202    |
| <i>IL6</i>     | Interleukin 6 (interferon, beta 2)                                                                        | 1.41E-04                  | 1.87E-04 | 0.071    |
| <i>IL8</i>     | Interleukin 8                                                                                             | 9.32E-06                  | 2.32E-05 | 0.111    |
| <i>IRAK1</i>   | Interleukin-1 receptor-associated kinase 1                                                                | 6.72E-04                  | 9.90E-04 | 0.178    |
| <i>IRAK2</i>   | Interleukin-1 receptor-associated kinase 2                                                                | 4.23E-04                  | 4.33E-04 | 0.583    |

|                 |                                                                                       |          |          |       |
|-----------------|---------------------------------------------------------------------------------------|----------|----------|-------|
| <i>IRAK4</i>    | Interleukin-1 receptor-associated kinase 4                                            | 3.87E-04 | 4.13E-04 | 0.458 |
| <i>IRF1</i>     | Interferon regulatory factor 1                                                        | 6.96E-04 | 1.06E-03 | 0.014 |
| <i>IRF3</i>     | Interferon regulatory factor 3                                                        | 1.15E-03 | 1.21E-03 | 0.591 |
| <i>JUN</i>      | Jun proto-oncogene                                                                    | 5.93E-03 | 6.90E-03 | 0.219 |
| <i>LTA</i>      | Lymphotoxin alpha (TNF superfamily, member 1)                                         | 5.43E-06 | 7.53E-06 | 0.203 |
| <i>LY86</i>     | Lymphocyte antigen 86                                                                 | 1.30E-05 | 2.57E-05 | 0.210 |
| <i>LY96</i>     | Lymphocyte antigen 96                                                                 | 1.47E-04 | 2.21E-04 | 0.102 |
| <i>MAP2K3</i>   | Mitogen-activated protein kinase kinase 3                                             | 8.94E-03 | 1.10E-02 | 0.048 |
| <i>MAP2K4</i>   | Mitogen-activated protein kinase kinase 4                                             | 2.76E-03 | 3.37E-03 | 0.128 |
| <i>MAP3K1</i>   | Mitogen-activated protein kinase kinase kinase 1                                      | 2.94E-04 | 3.20E-04 | 0.326 |
| <i>MAP3K7</i>   | Mitogen-activated protein kinase kinase kinase 7                                      | 2.17E-03 | 2.49E-03 | 0.204 |
| <i>MAP4K4</i>   | Mitogen-activated protein kinase kinase kinase 4                                      | 1.49E-03 | 2.07E-03 | 0.017 |
| <i>MAPK8</i>    | Mitogen-activated protein kinase 8                                                    | 2.40E-03 | 3.04E-03 | 0.037 |
| <i>MAPK8IP3</i> | Mitogen-activated protein kinase 8 interacting protein 3                              | 1.00E-03 | 1.14E-03 | 0.189 |
| <i>MYD88</i>    | Myeloid differentiation primary response gene (88)                                    | 2.25E-04 | 2.88E-04 | 0.084 |
| <i>NFKB1</i>    | Nuclear factor of kappa light polypeptide gene enhancer in B-cells 1                  | 7.60E-04 | 8.68E-04 | 0.169 |
| <i>NFKB2</i>    | Nuclear factor of kappa light polypeptide gene enhancer in B-cells 2 (p49/p100)       | 3.09E-04 | 4.22E-04 | 0.055 |
| <i>NFKBIA</i>   | Nuclear factor of kappa light polypeptide gene enhancer in B-cells inhibitor, alpha   | 9.37E-03 | 1.26E-02 | 0.078 |
| <i>NFKBIL1</i>  | Nuclear factor of kappa light polypeptide gene enhancer in B-cells inhibitor-like 1   | 6.04E-04 | 5.93E-04 | 0.925 |
| <i>NFRKB</i>    | Nuclear factor related to kappaB binding protein                                      | 5.96E-04 | 7.38E-04 | 0.071 |
| <i>NR2C2</i>    | Nuclear receptor subfamily 2, group C, member 2                                       | 1.03E-03 | 1.21E-03 | 0.099 |
| <i>PELI1</i>    | Pellino homolog 1 (Drosophila)                                                        | 1.03E-03 | 1.35E-03 | 0.268 |
| <i>PPARA</i>    | Peroxisome proliferator-activated receptor alpha                                      | 6.32E-03 | 7.26E-03 | 0.119 |
| <i>PRKRA</i>    | Protein kinase, interferon-inducible double stranded RNA dependent activator          | 6.18E-03 | 7.65E-03 | 0.026 |
| <i>PTGS2</i>    | Prostaglandin-endoperoxide synthase 2 (prostaglandin G/H synthase and cyclooxygenase) | 8.46E-06 | 1.93E-05 | 0.121 |
| <i>REL</i>      | V-rel reticuloendotheliosis viral oncogene homolog (avian)                            | 1.00E-03 | 1.17E-03 | 0.015 |
| <i>RELA</i>     | V-rel reticuloendotheliosis viral oncogene homolog A (avian)                          | 1.93E-03 | 2.32E-03 | 0.033 |
| <i>RIPK2</i>    | Receptor-interacting serine-threonine kinase 2                                        | 1.66E-04 | 1.76E-04 | 0.416 |
| <i>SARM1</i>    | Sterile alpha and TIR motif containing 1                                              | 2.16E-04 | 2.55E-04 | 0.217 |
| <i>SIGIRR</i>   | Single immunoglobulin and toll-interleukin 1 receptor (TIR) domain                    | 3.24E-05 | 3.52E-05 | 0.467 |
| <i>TAB1</i>     | TGF-beta activated kinase 1/MAP3K7 binding protein 1                                  | 1.62E-03 | 3.07E-03 | 0.330 |
| <i>TBK1</i>     | TANK-binding kinase 1                                                                 | 1.02E-03 | 2.00E-03 | 0.327 |
| <i>TICAM1</i>   | Toll-like receptor adaptor molecule 1                                                 | 6.85E-04 | 8.09E-04 | 0.277 |

|                 |                                                                     |          |          |       |
|-----------------|---------------------------------------------------------------------|----------|----------|-------|
| <i>TICAM2</i>   | Toll-like receptor adaptor molecule 2                               | 8.65E-04 | 2.75E-03 | 0.343 |
| <i>TIRAP</i>    | Toll-interleukin 1 receptor (TIR) domain containing adaptor protein | 3.24E-04 | 3.75E-04 | 0.366 |
| <i>TLR1</i>     | Toll-like receptor 1                                                | 5.51E-05 | 1.03E-04 | 0.164 |
| <i>TLR10</i>    | Toll-like receptor 10                                               | 3.10E-05 | 7.34E-06 | 0.343 |
| <i>TLR2</i>     | Toll-like receptor 2                                                | 8.07E-05 | 1.98E-04 | 0.074 |
| <i>TLR3</i>     | Toll-like receptor 3                                                | 1.65E-04 | 2.13E-04 | 0.062 |
| <i>TLR4</i>     | Toll-like receptor 4                                                | 6.80E-04 | 1.02E-03 | 0.006 |
| <i>TLR5</i>     | Toll-like receptor 5                                                | 2.03E-04 | 3.27E-04 | 0.039 |
| <i>TLR6</i>     | Toll-like receptor 6                                                | 7.56E-05 | 1.59E-04 | 0.042 |
| <i>TLR7</i>     | Toll-like receptor 7                                                | 4.09E-05 | 6.38E-05 | 0.346 |
| <i>TLR8</i>     | Toll-like receptor 8                                                | 2.91E-05 | 6.51E-05 | 0.176 |
| <i>TLR9</i>     | Toll-like receptor 9                                                | 6.73E-05 | 6.22E-05 | 0.539 |
| <i>TNF</i>      | Tumor necrosis factor                                               | 2.51E-05 | 3.01E-05 | 0.788 |
| <i>TNFRSF1A</i> | Tumor necrosis factor receptor superfamily, member 1A               | 2.14E-03 | 2.49E-03 | 0.092 |
| <i>TOLLIP</i>   | Toll interacting protein                                            | 2.13E-03 | 2.42E-03 | 0.101 |
| <i>TRAF6</i>    | TNF receptor-associated factor 6                                    | 1.74E-03 | 1.91E-03 | 0.295 |
| <i>UBE2N</i>    | Ubiquitin-conjugating enzyme E2N                                    | 4.95E-03 | 5.82E-03 | 0.045 |

**Suppl. Table 1.** Genes measured by RT Profiler PCR Array for Human TLR Signaling in skeletal muscle. Data are average  $2^{-\Delta\Delta Ct}$  after saline and lipid infusion. p-values (paired t-test) of saline versus lipid are shown.
